# Supplementary material for: Natural Inspired Carboxymethyl Cellulose (CMC) Doped with Ammonium Carbonate (AC) as Biopolymer Electrolyte
Source: Polymers (Basel). 2020 Oct 26;12(11):2487. doi: 10.3390/polym12112487 (PMC7693293; doi:10.3390/polym12112487)
Supplement: Supplementary file 1 [file polymers-12-02487-s001.pdf]

# Supplementary Material:

## Natural Inspired Carboxymethyl Cellulose (CMC) Doped with Ammonium Carbonate (AC) as Biopolymer Electrolyte

M.I.H. Sohaimy <sup>1</sup> and M.I.N. Isa <sup>1, 2,\*</sup>

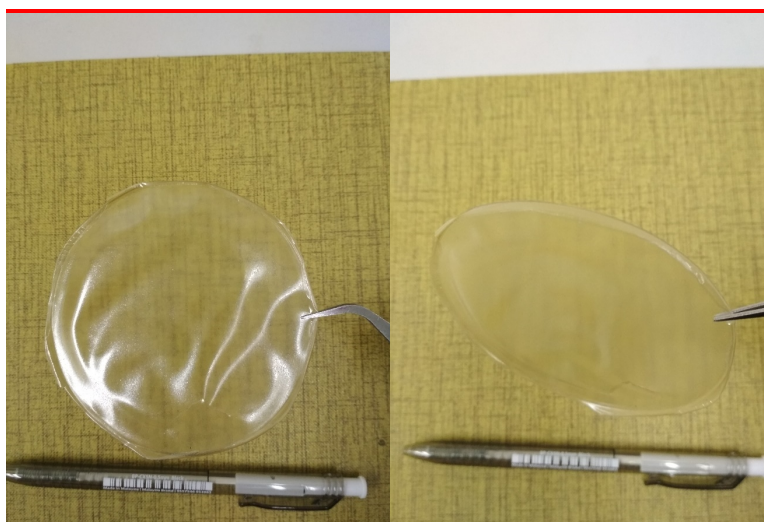

**Figure S1.** The physical appearance of CMC-AC biopolymer films.

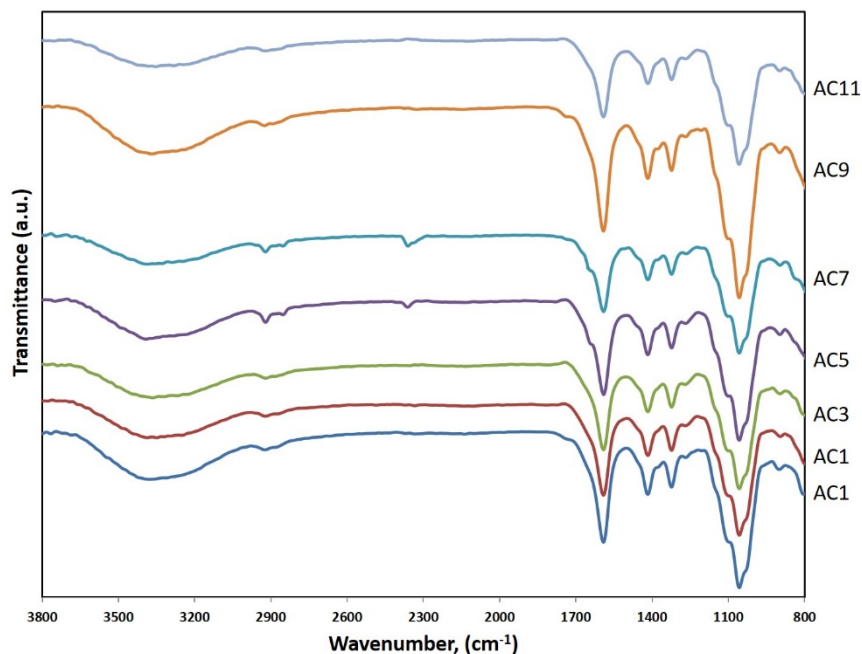

**Figure S2.** Overall FTIR spectrum of CMC-AC electrolyte.

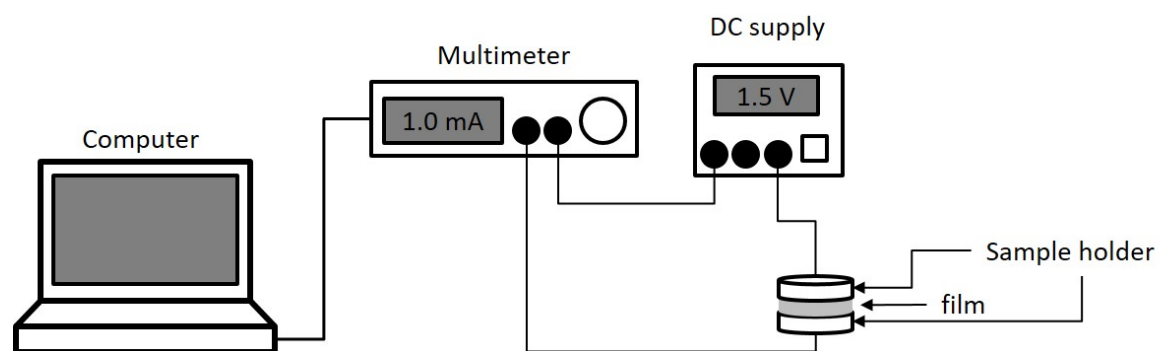

**Figure S3.** Transference measurement testing setup.

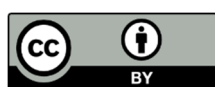

© 2020 by the authors. Submitted for possible open access publication under the terms and conditions of the Creative Commons Attribution (CC BY) license (<http://creativecommons.org/licenses/by/4.0/>).
